# Supplementary material
Source: PubMed Central journal article supplement (PMC7985611)
Supplement: mmc6.pdf [file mmc6.pdf]

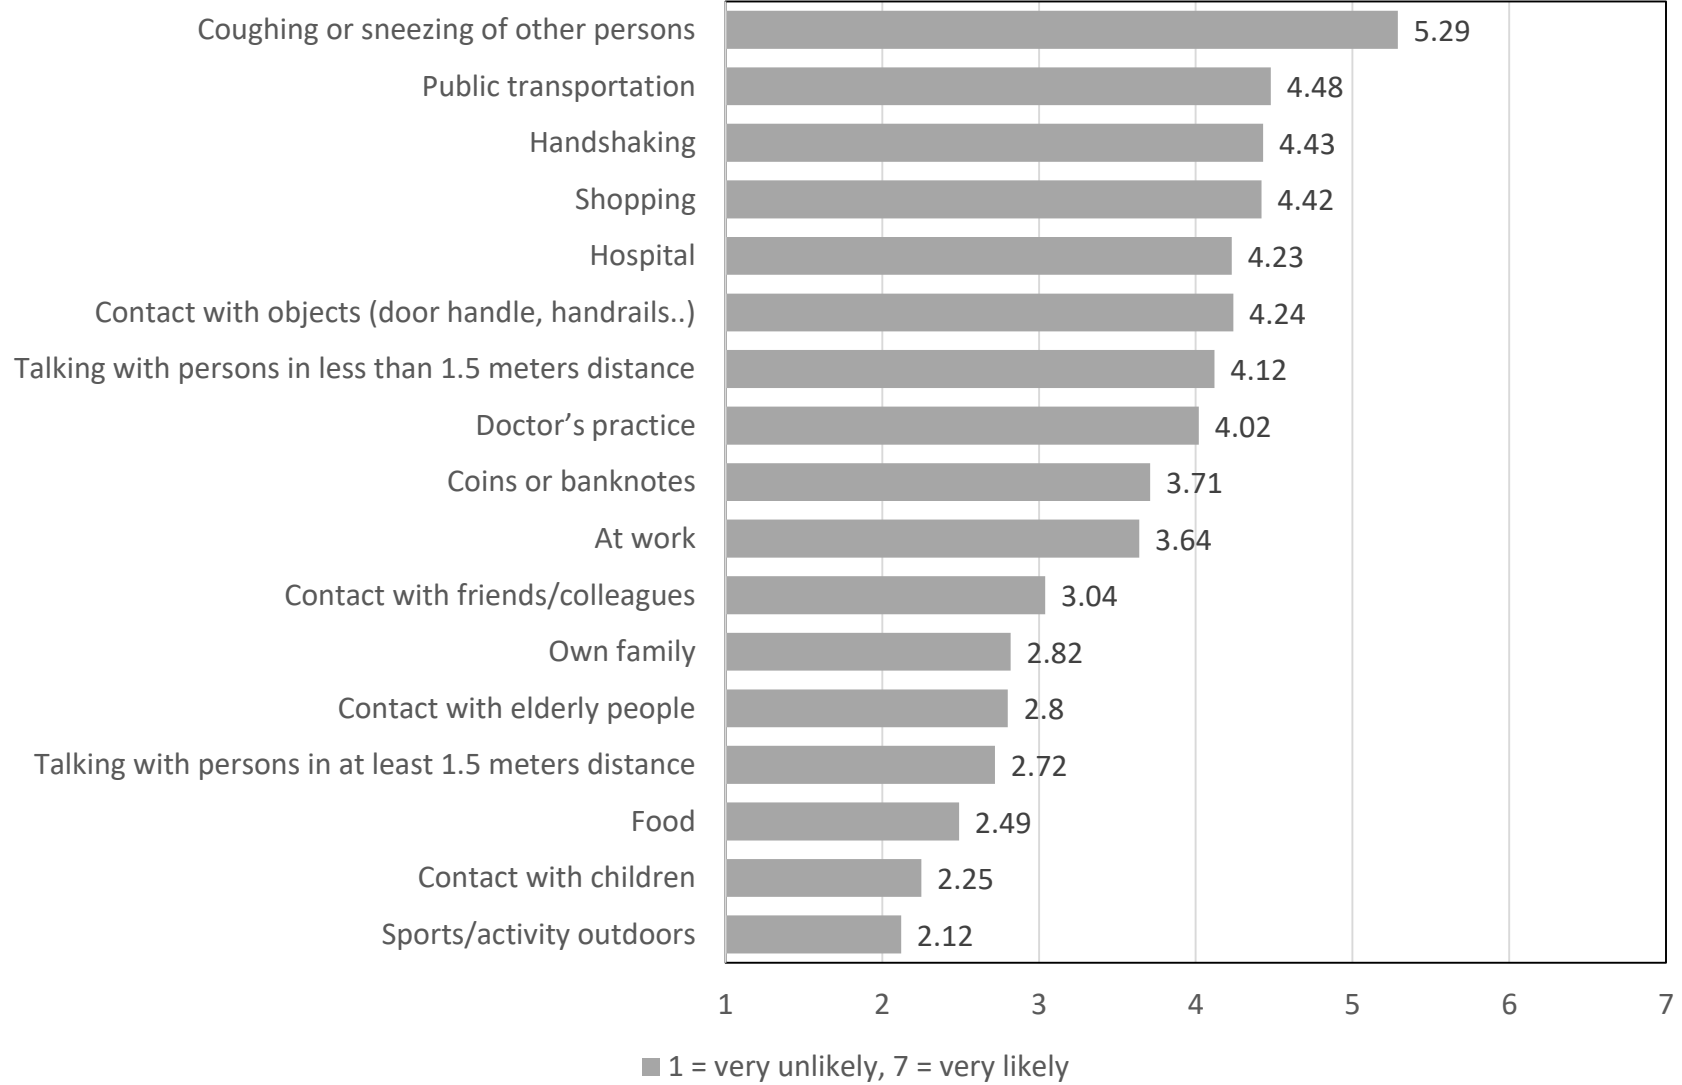

Assessment of infection likelihood in different situations. Mean scores (1 = extremely unlikely, 7 = extremely likely)
